# Supplementary material
Source: PubMed Central journal article supplement (PMC9489613)
Supplement: NIHMS1808964-supplement-supinfo.pdf [file NIHMS1808964-supplement-supinfo.pdf]

## Supplemental Materials

**Table S1.** All-cause dementia was defined by a narrow Standardized Medical Dictionary for Regulatory Activities (MedDRA) Query (SMQ) of “dementia” including 21 preferred terms.

**Table S2.** Basic characteristics of 21 cardiovascular and renal outcome trials.

**Table S3.** Begg’s test and Egger’s test for the effects of DPP-4 inhibitors, GLP-1RAs, and SGLT2 inhibitors on risk of dementia.

**Figure S1.** The flowchart of the study selection. CENTRAL, Cochrane Central Register of Controlled Trials; DPP-4 inhibitors, dipeptidyl peptidase-4 inhibitors; GLP-1RAs, glucagon-like peptide-1 receptor agonists; SGLT2 inhibitors, sodium-glucose co-transporter-2 inhibitors.

**Figure S2.** Sensitivity analysis of the effects of novel glucose-lowering drugs on the risk of all-cause dementia (A) and vascular dementia (B) in participants with or without type 2 diabetes. OR, odds ratio; CI, confidence interval; DPP-4 inhibitors, dipeptidyl peptidase-4 inhibitors; GLP-1RAs, glucagon-like peptide-1 receptor agonists; SGLT2 inhibitors, sodium-glucose co-transporter-2 inhibitors.

**Figure S3.** The funnel plot for the effects of DPP-4 inhibitors, GLP-1RAs, and SGLT2 inhibitors on risk of dementia. DPP-4 inhibitors, dipeptidyl peptidase-4 inhibitors; GLP-1RAs, glucagon-like peptide-1 receptor agonists; SGLT2 inhibitors, sodium-glucose co-transporter-2 inhibitors.

**Table S1.** All-cause dementia was defined by a narrow Standardized Medical Dictionary for Regulatory Activities (MedDRA) Query (SMQ) of “dementia” including 21 preferred terms

| Outcome            | Preferred Terms                                                                                                                                                                                                                                                                                                                                                                                                                                                                                                                                                                                                                                                                                                                                         |
|--------------------|---------------------------------------------------------------------------------------------------------------------------------------------------------------------------------------------------------------------------------------------------------------------------------------------------------------------------------------------------------------------------------------------------------------------------------------------------------------------------------------------------------------------------------------------------------------------------------------------------------------------------------------------------------------------------------------------------------------------------------------------------------|
| All cause dementia | Clinical dementia rating scale score abnormal<br>Corticobasal degeneration<br>Creutzfeldt-Jakob disease<br>Dementia<br>Dementia Alzheimer's type<br>Dementia of the Alzheimer's type, uncomplicated<br>Dementia of the Alzheimer's type, with delirium<br>Dementia of the Alzheimer's type, with delusions<br>Dementia of the Alzheimer's type, with depressed mood<br>Dementia with Lewy bodies<br>Early onset familial Alzheimer's disease<br>Frontotemporal dementia<br>Hippocampal sclerosis<br>Korsakoff's syndrome<br>Mini mental status examination abnormal<br>Mixed dementia<br>Presenile dementia<br>Prion disease<br>Progressive supranuclear palsy<br>Scatolia<br>Senile dementia<br>Variant Creutzfeldt-Jakob disease<br>Vascular dementia |
| Vascular dementia  | Vascular dementia                                                                                                                                                                                                                                                                                                                                                                                                                                                                                                                                                                                                                                                                                                                                       |

**Table S2.** Basic characteristics of 21 cardiovascular and renal outcome trials

| Study                        | NCT         | Trial name    | No. of patients | Population                                                                                                                             | Patients with T2D (%) | Mean age (years) | Male (%) | White (%) | Mean duration of diabetes (years) | Comparisons             | Median follow-up (years) |
|------------------------------|-------------|---------------|-----------------|----------------------------------------------------------------------------------------------------------------------------------------|-----------------------|------------------|----------|-----------|-----------------------------------|-------------------------|--------------------------|
| Scirica 2013 <sup>1</sup>    | NCT01107886 | SAVOR-TIMI 53 | 16,492          | T2D patients with a history of, or were at risk for cardiovascular events                                                              | 100                   | 65               | 67       | 75        | 10                                | Saxagliptin vs Placebo  | 2.1                      |
| White 2013 <sup>2</sup>      | NCT00968708 | EXAMINE       | 5,380           | T2D patients with either an acute myocardial infarction or unstable angina requiring hospitalization within the previous 15 to 90 days | 100                   | 61               | 68       | 73        | 7                                 | Alogliptin vs Placebo   | 1.5                      |
| Green 2015 <sup>3</sup>      | NCT00790205 | TECOS         | 14,671          | T2D patients with established cardiovascular disease                                                                                   | 100                   | 66               | 71       | 68        | 12                                | Sitagliptin vs Placebo  | 3                        |
| Gantz 2017 <sup>4</sup>      | NCT01703208 | OMNEON        | 4,192           | T2D patients with established cardiovascular disease                                                                                   | 100                   | 64               | 70       | 81        | 12                                | Omarigliptin vs Placebo | 1.8                      |
| Rosenstock 2019 <sup>5</sup> | NCT01897532 | CARMELINA     | 6,979           | T2D patients with high cardiovascular risk                                                                                             | 100                   | 66               | 63       | 80        | 15                                | Linagliptin vs Placebo  | 2.2                      |
| Pfeffer 2015 <sup>6</sup>    | NCT01147250 | ELIXA         | 6,068           | T2D patients who had had a myocardial infarction or who had been hospitalized for unstable angina within the previous 180 day          | 100                   | 60               | 70       | 75        | 9                                 | Lixisenatide vs Placebo | 2.1                      |
| Marso 2016 <sup>7</sup>      | NCT01179048 | LEADER        | 9,340           | T2D patients with high cardiovascular risk                                                                                             | 100                   | 64               | 64       | 78        | 13                                | Liraglutide vs Placebo  | 3.8                      |
| Marso 2016 <sup>8</sup>      | NCT01720446 | SUSTAIN-6     | 3,297           | T2D patients with established cardiovascular disease or chronic kidney                                                                 | 100                   | 65               | 61       | 83        | 14                                | Semaglutide vs Placebo  | 2.1                      |

|                              |                               |                  |        |                                                                                                                                           |     |    |    |    |    |                             |     |
|------------------------------|-------------------------------|------------------|--------|-------------------------------------------------------------------------------------------------------------------------------------------|-----|----|----|----|----|-----------------------------|-----|
|                              |                               |                  |        | disease of stage 3 or higher or an age of 60 years or more with at least one cardiovascular risk factor                                   |     |    |    |    |    |                             |     |
| Holman 2017 <sup>9</sup>     | NCT0114 4338                  | EXSCEL           | 14,752 | T2D patients with or without previous cardiovascular disease                                                                              | 100 | 62 | 62 | 76 | 12 | Exenatide vs Placebo        | 3.2 |
| Hernandez 2018 <sup>10</sup> | NCT0246 5515                  | HARMONY          | 9,432  | T2D patients aged at least 40 years with cardiovascular disease                                                                           | 100 | 64 | 70 | 70 | 14 | Albiglutide vs Placebo      | 1.6 |
| Gerstein 2019 <sup>11</sup>  | NCT0139 4952                  | REWIND           | 9,901  | T2D patients aged at least 50 years with either a previous cardiovascular event or cardiovascular risk factors                            | 100 | 66 | 54 | 76 | 11 | Dulaglutide vs Placebo      | 5.4 |
| Husain 2019 <sup>12</sup>    | NCT0269 2716                  | PIONEER-6        | 3,183  | T2D patients at high cardiovascular risk                                                                                                  | 100 | 66 | 68 | 72 | 15 | Oral semaglutide vs Placebo | 1.3 |
| Gerstein 2021 <sup>13</sup>  | NCT0349 6298                  | AMPLITUDE-O      | 4,076  | T2D patients with either a history of cardiovascular disease or current kidney disease plus at least one other cardiovascular risk factor | 100 | 72 | 55 | 76 | NR | Efpeglenatide vs Placebo    | 2.2 |
| Zinman 2015 <sup>14</sup>    | NCT0113 1676                  | EMPA-REG OUTCOME | 7,020  | T2D patients with established cardiovascular disease                                                                                      | 100 | 63 | 72 | 72 | NR | Empagliflozin vs Placebo    | 3.1 |
| Neal 2017 <sup>15</sup>      | NCT0103 2629/<br>NCT0198 9754 | CANVAS Program   | 10,142 | T2D patients with high cardiovascular risk                                                                                                | 100 | 63 | 64 | 78 | 14 | Canagliflozin vs Placebo    | 2.4 |
| Wiviott 2018 <sup>16</sup>   | NCT0173 0534                  | DECLARE-TIMI 58  | 17,161 | T2D patients had or were at risk for atherosclerotic cardiovascular disease                                                               | 100 | 64 | 63 | 80 | 11 | Dapagliflozin vs Placebo    | 4.2 |

|                              |             |                 |       |                                                                                                                       |      |    |    |    |    |                          |     |
|------------------------------|-------------|-----------------|-------|-----------------------------------------------------------------------------------------------------------------------|------|----|----|----|----|--------------------------|-----|
| Perkovic 2019 <sup>17</sup>  | NCT02065791 | CREDESCENCE     | 4,401 | T2D patients with albuminuric chronic kidney disease                                                                  | 100  | 63 | 66 | 67 | 16 | Canagliflozin vs Placebo | 2.6 |
| Cannon 2020 <sup>18</sup>    | NCT01986881 | VERTIS-CV       | 8,246 | T2D patients with atherosclerotic cardiovascular disease                                                              | 100  | 64 | 70 | 88 | 13 | Ertugliflozin vs Placebo | 3.5 |
| McMurray 2019 <sup>19</sup>  | NCT03036124 | DAPA-HF         | 4,744 | Patients with established heart failure and a reduced ejection fraction, regardless of the presence or absence of T2D | 41.8 | 66 | 77 | 70 | NR | Dapagliflozin vs Placebo | 1.5 |
| Heerspink 2020 <sup>20</sup> | NCT03036150 | DAPA-CKD        | 4,304 | Patients with chronic kidney disease                                                                                  | 67.5 | 62 | 67 | 53 | NR | Dapagliflozin vs Placebo | 2.4 |
| Packer 2020 <sup>21</sup>    | NCT03057977 | EMPEROR-Reduced | 3,730 | Patients with class II, III, or IV heart failure and an ejection fraction of 40% or less                              | 49.8 | 67 | 76 | 70 | NR | Empagliflozin vs Placebo | 1.3 |

T2D, Type 2 diabetes; CVD, cardiovascular disease; CKD, chronic kidney disease; NR, not reported

**Table S3.** Begg's test and Egger's test for the effects of DPP-4 inhibitors, GLP-1RAs, and SGLT2 inhibitors on risk of dementia.

|                  | <b>Begg's test</b> | <b>Egger's test</b> |
|------------------|--------------------|---------------------|
| DPP-4 inhibitors | 0.81               | 0.27                |
| GLP-1RAs         | 0.71               | 0.53                |
| SGLT2 inhibitors | 0.76               | 0.91                |

DPP-4 inhibitors, dipeptidyl peptidase-4 inhibitors; GLP-1RAs, glucagon-like peptide-1 receptor agonists; SGLT2 inhibitors, sodium-glucose co-transporter-2 inhibitors

**Figure S1.** The flowchart of the study selection. CENTRAL, Cochrane Central Register of Controlled Trials; DPP-4 inhibitors, dipeptidyl peptidase-4 inhibitors; GLP-1RAs, glucagon-like peptide-1 receptor agonists; SGLT2 inhibitors, sodium-glucose co-transporter-2 inhibitors.

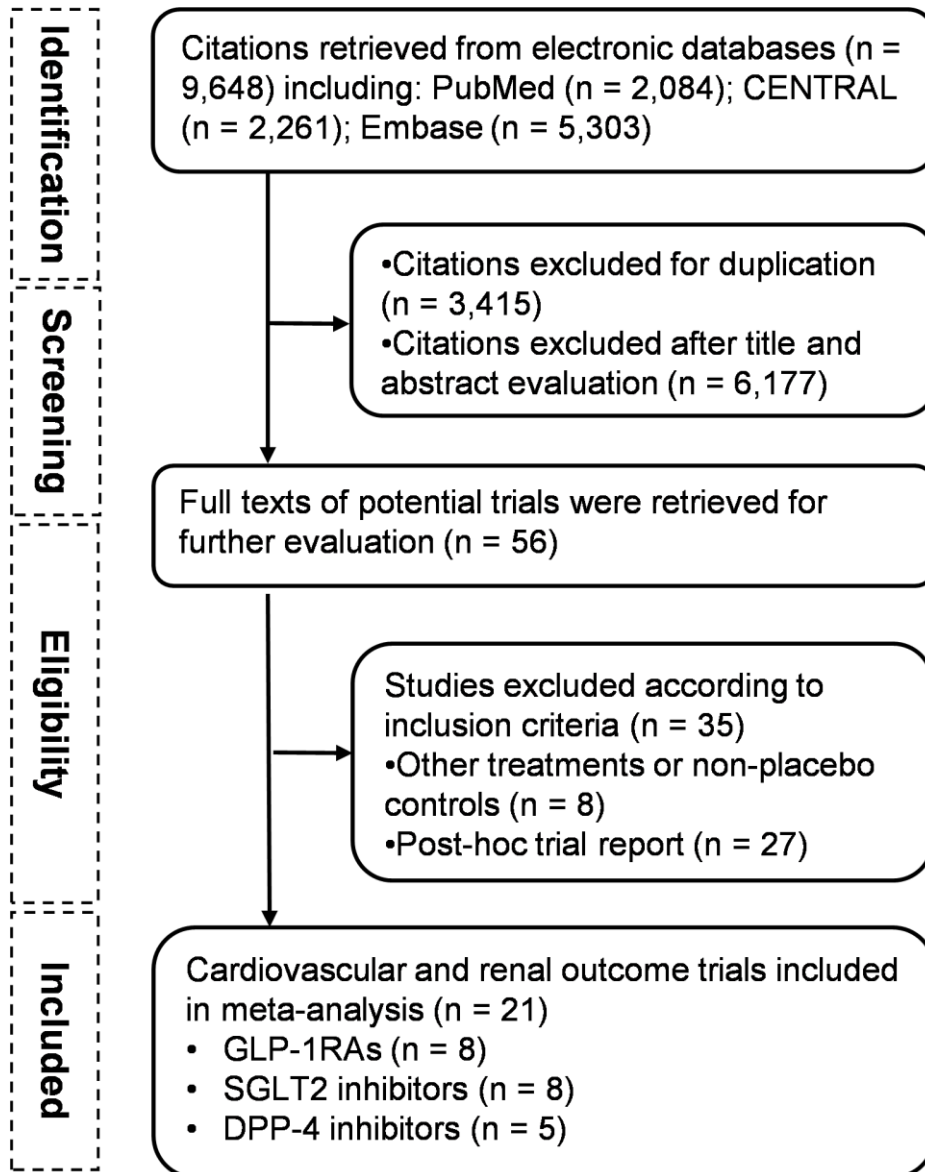

**Figure S2.** Sensitivity analysis of the effects of novel glucose-lowering drugs on the risk of all-cause dementia (A) and vascular dementia (B) in patients with or without type 2 diabetes. OR, odds ratio; CI, confidence interval; DPP-4 inhibitors, dipeptidyl peptidase-4 inhibitors; GLP-1RAs, glucagon-like peptide-1 receptor agonists; SGLT2 inhibitors, sodium-glucose co-transporter-2 inhibitors.

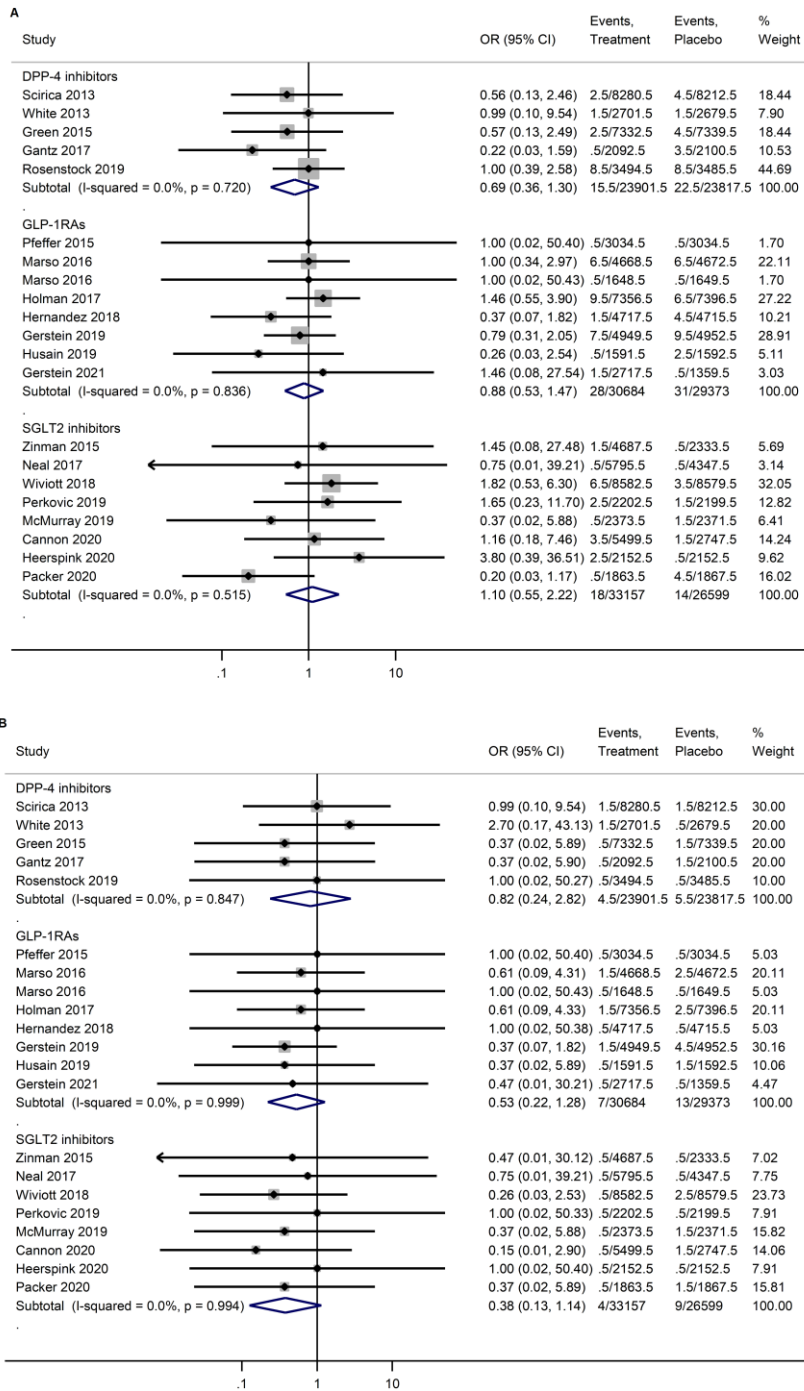



**Figure S3.** The funnel plot for the effects of DPP-4 inhibitors, GLP-1RAs, and SGLT2 inhibitors on risk of dementia. OR, odds ratio; DPP-4 inhibitors, dipeptidyl peptidase-4 inhibitors; GLP-1RAs, glucagon-like peptide-1 receptor agonists; SGLT2 inhibitors, sodium-glucose co-transporter-2 inhibitors

**DPP-4 inhibitors**

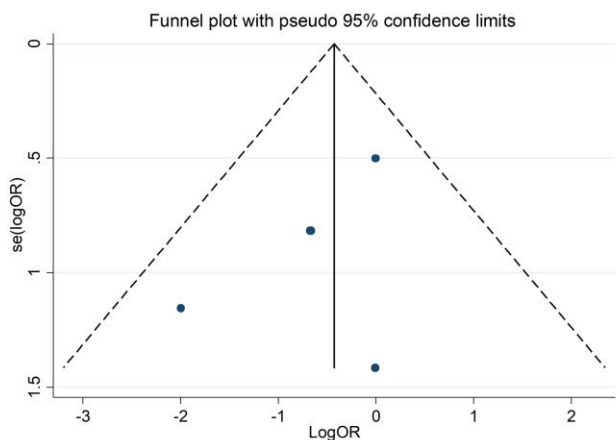

**GLP-1RAs**

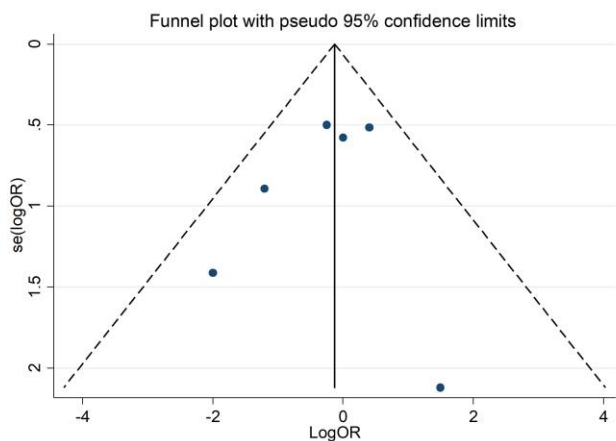

**SGLT2 inhibitors**

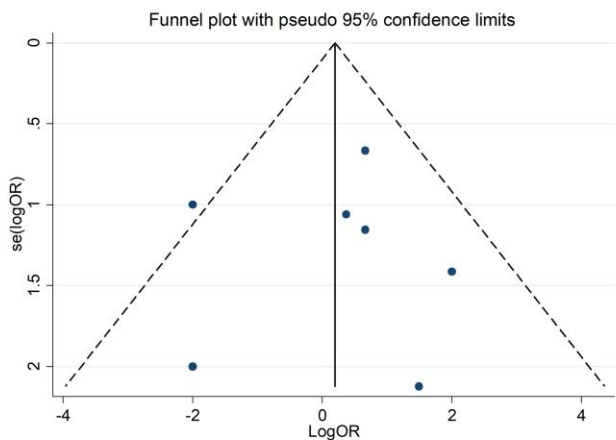

## References

1. Scirica BM, Bhatt DL, Braunwald E, et al. Saxagliptin and cardiovascular outcomes in patients with type 2 diabetes mellitus. *N Engl J Med.* 2013;369:1317-1326.
2. White WB, Cannon CP, Heller SR, et al. Alogliptin after acute coronary syndrome in patients with type 2 diabetes. *N Engl J Med.* 2013;369:1327-1335.
3. Green JB, Bethel MA, Armstrong PW, et al. Effect of Sitagliptin on Cardiovascular Outcomes in Type 2 Diabetes. *N Engl J Med.* 2015;373:232-242.
4. Gantz I, Chen M, Suryawanshi S, et al. A randomized, placebo-controlled study of the cardiovascular safety of the once-weekly DPP-4 inhibitor omarigliptin in patients with type 2 diabetes mellitus. *Cardiovasc Diabetol.* 2017;16:112.
5. Rosenstock J, Perkovic V, Johansen OE, et al. Effect of Linagliptin vs Placebo on Major Cardiovascular Events in Adults With Type 2 Diabetes and High Cardiovascular and Renal Risk: The CARMELINA Randomized Clinical Trial. *JAMA.* 2019;321:69-79.
6. Pfeffer MA, Claggett B, Diaz R, et al. Lixisenatide in Patients with Type 2 Diabetes and Acute Coronary Syndrome. *N Engl J Med.* 2015;373:2247-2257.
7. Marso SP, Daniels GH, Brown-Frandsen K, et al. Liraglutide and Cardiovascular Outcomes in Type 2 Diabetes. *N Engl J Med.* 2016;375:311-322.
8. Marso SP, Bain SC, Consoli A, et al. Semaglutide and Cardiovascular Outcomes in Patients with Type 2 Diabetes. *N Engl J Med.* 2016;375:1834-1844.
9. Holman RR, Bethel MA, Mentz RJ, et al. Effects of Once-Weekly Exenatide on Cardiovascular Outcomes in Type 2 Diabetes. *N Engl J Med.* 2017;377:1228-1239.
10. Hernandez AF, Green JB, Janmohamed S, et al. Albiglutide and cardiovascular outcomes in patients with type 2 diabetes and cardiovascular disease (Harmony Outcomes): a double-blind, randomised placebo-controlled trial. *Lancet.* 2018;392:1519-1529.
11. Gerstein HC, Colhoun HM, Dagenais GR, et al. Dulaglutide and cardiovascular outcomes in type 2 diabetes (REWIND): a double-blind, randomised placebo-controlled trial. *Lancet.* 2019;394:121-130.
12. Husain M, Birkenfeld AL, Donsmark M, et al. Oral Semaglutide and Cardiovascular Outcomes in Patients with Type 2 Diabetes. *N Engl J Med.* 2019;381:841-851.
13. Gerstein HC, Sattar N, Rosenstock J, et al. Cardiovascular and Renal Outcomes with Efglenatide in Type 2 Diabetes. *N Engl J Med.* 2021;385:896-907.
14. Zinman B, Wanner C, Lachin JM, et al. Empagliflozin, Cardiovascular Outcomes, and Mortality in Type 2 Diabetes. *N Engl J Med.* 2015;373:2117-2128.
15. Neal B, Perkovic V, Mahaffey KW, et al. Canagliflozin and Cardiovascular and Renal Events in Type 2 Diabetes. *N Engl J Med.* 2017;377:644-657.
16. Wiviott SD, Raz I, Bonaca MP, et al. Dapagliflozin and Cardiovascular Outcomes in Type 2 Diabetes. *N Engl J Med.* 2019;380:347-357.
17. Perkovic V, Jardine MJ, Neal B, et al. Canagliflozin and Renal Outcomes in Type 2 Diabetes and Nephropathy. *N Engl J Med.* 2019;380:2295-2306.
18. Cannon CP, Pratley R, Dagogo-Jack S, et al. Cardiovascular Outcomes with Ertugliflozin in Type 2 Diabetes. *N Engl J Med.* 2020;383:1425-1435.
19. McMurray JJV, Solomon SD, Inzucchi SE, et al. Dapagliflozin in Patients with Heart Failure and Reduced Ejection Fraction. *N Engl J Med.* 2019;381:1995-2008.
20. Heerspink HJL, Stefansson BV, Correa-Rotter R, et al. Dapagliflozin in Patients with Chronic Kidney Disease. *N Engl J Med.* 2020;383:1436-1446.
21. Packer M, Anker SD, Butler J, et al. Cardiovascular and Renal Outcomes with Empagliflozin in Heart Failure. *N Engl J Med.* 2020;383:1413-1424.
